# Supplementary material
Source: publisher figshare collection journal article supplement (https://acs.figshare.com/ndownloader/files/13107068)
Supplement: Supplementary file 1 [file 13107068]

**Supplementary Table S1: Molecular masses of the GRN peptides**

| Peptide             | Theoretical molecular weight (Oxidised) | Experimental molecular weight* (Oxidised) |
|---------------------|-----------------------------------------|-------------------------------------------|
| GRN <sub>P2A</sub>  | 2556.02                                 | 2556.71                                   |
| GRN <sub>P4A</sub>  | 2556.02                                 | 2556.56                                   |
| GRN <sub>P10A</sub> | 2556.02                                 | 2556.59                                   |
| GRN <sub>3Ala</sub> | 2503.98                                 | 2504.64                                   |

\* The masses of the peptides were determined using MALDI mass spectrometry.
